# Supplementary material for: A theoretical study of the gas-phase reactions of propadiene with NO3: mechanism, kinetics and insights
Source: Royal Society of Chemistry journal article supplement (doi:10.1039/d3ra02523c), 2023-01-01
Supplement: d3ra02523c1.pdf [file d3ra02523c1.pdf]

# **A theoretical study on gas-phase reactions of propadiene with NO<sub>3</sub>: mechanism, kinetics and insights**

Haomin Wang,<sup>1</sup> Meilian Zhao,<sup>2</sup> Qiwen Zuo,<sup>1</sup> Mingxing Liu,<sup>1</sup> Xinyu He,<sup>1</sup>

Zhiguo Wang,<sup>1</sup> Yuxi Sun,<sup>1</sup> Ruoqing Song,<sup>1</sup> Yunju Zhang,<sup>1\*</sup>

*<sup>1</sup>Key Laboratory of Photoinduced Functional Materials, Key Laboratory of Inorganic*

*Materials Preparation and Synthesis, Mianyang Normal University, Mianyang*

*621000, PR China*

*<sup>2</sup>Shool of Public Health , Chengdu University of Traditional Chinese Medicine,*

*ChengDu PR China*

---

<sup>1\*</sup> Corresponding author. Email address: [zhangyj010@nenu.edu.cn](mailto:zhangyj010@nenu.edu.cn) Tel.: +86 816 2200064; Fax: +86 816 2200819

### SHEME 1

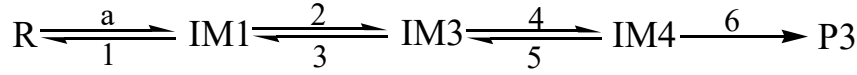

### SHEME2

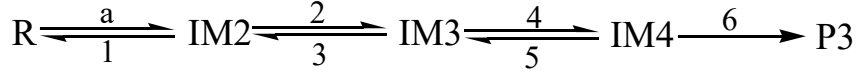

For SCHEME 1:

$$k_{\text{IM1}}(T, P) = \frac{\alpha_a}{h} \frac{Q_t^\ddagger Q_r^\ddagger}{Q_{\text{CH}_2=\text{CH}=\text{CH}_2} Q_{\text{NO}_3}} e^{-E_a/RT} \times \int_0^\infty \frac{\omega}{X_3} N_a(E^\ddagger) e^{-E^\ddagger/RT} dE^\ddagger \quad (1)$$

$$k_{\text{IM3}}(T, P) = \frac{\alpha_a}{h} \frac{Q_t^\ddagger Q_r^\ddagger}{Q_{\text{CH}_2=\text{CH}=\text{CH}_2} Q_{\text{NO}_3}} e^{-E_a/RT} \times \int_0^\infty \frac{\omega X_2}{X_3} N_a(E^\ddagger) e^{-E^\ddagger/RT} dE^\ddagger \quad (2)$$

$$k_{\text{IM4}}(T, P) = \frac{\alpha_a}{h} \frac{Q_t^\ddagger Q_r^\ddagger}{Q_{\text{CH}_2=\text{CH}=\text{CH}_2} Q_{\text{NO}_3}} e^{-E_a/RT} \times \int_0^\infty \frac{\omega X_2}{X_3} N_a(E^\ddagger) e^{-E^\ddagger/RT} dE^\ddagger \quad (3)$$

$$k_{\text{P3}}(T, P) = \frac{\alpha_a}{h} \frac{Q_t^\ddagger Q_r^\ddagger}{Q_{\text{CH}_2\text{CH}=\text{CH}_2} Q_{\text{NO}_3}} e^{-E_a/RT} \times \int_0^\infty \frac{k_6(E) X_1 X_2}{X_3} N_a(E^\ddagger) e^{-E^\ddagger/RT} dE^\ddagger \quad (4)$$

Where

$$X_1 = k_4(E)/(k_5(E) + k_6(E) + \omega)$$

$$X_2 = k_2(E)/(k_3(E) + k_4(E) + \omega - k_5(E) * X_1)$$

$$X_3 = k_1(E) + k_2(E) - k_3(E) * X_2 + \omega$$

The microcanonical rate constant is calculated using the RRKM theory as follows:

$$k_i(E) = \alpha_i C_i N_i(E_i^\ddagger) / h \rho_j(E_j) \quad (5)$$

In the above equations,  $\alpha_a$  is the statistical factor for the reaction path a, and  $\alpha_i$  is the statistical factor (degeneracy) for the  $i$ th reaction path;  $E_a$  is the energy barrier for the reaction step a.  $Q_{\text{NO}_3}$  and  $Q_{\text{CH}_2=\text{CH}=\text{CH}_2}$  are the total partition function of  $\text{NO}_3$  and  $\text{CH}_2=\text{CH}=\text{CH}_2$ , respectively;  $Q_t^\ddagger$  and  $Q_r^\ddagger$  are the translational and rotational partition

functions of entrance transition state, respectively;  $N_a(E^\ddagger)$  is the number of state for the association transition state with excess energy  $E^\ddagger$  above the association barrier.  $k_i(E)$  is the energy-specific rate constant for the  $i$ th channel and  $C_i$  is the ratio of the overall rotational partition function of the  $TS_i$  and  $IM_j$ ;  $N_i(E_i^\ddagger)$  is the number of states at the energy above the barrier height for transition state  $i$ ;  $\rho_j(E_j)$  is the density of states at energy  $E_j$  of the intermediate. The density of states and the number of states are calculated using the extended Beyer-Swinehart algorithm.

The calculation process for SCHEME 2 is similar to that of SCHEME 1.

The total rate constants  $k_{\text{tot}}$  is equal to  $k_{\text{IM1}} + k_{\text{IM2}} + k_{\text{IM3}}(\text{SCHEME 1}) + k_{\text{IM3}}(\text{SCHEME 2}) + k_{\text{IM4}}(\text{SCHEME 1}) + k_{\text{IM4}}(\text{SCHEME 2}) + k_{\text{P3}}(\text{SCHEME 1}) + k_{\text{P3}}(\text{SCHEME 2})$

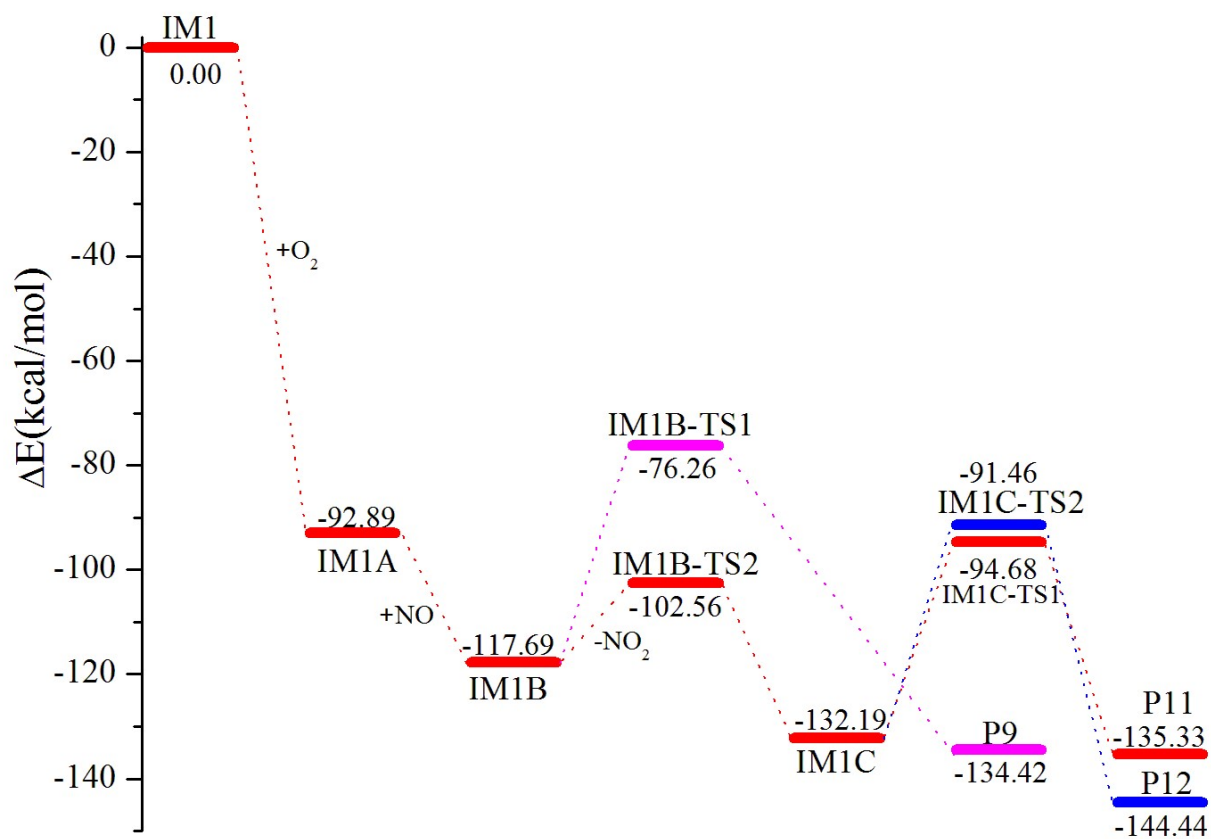

**Figure S1.** Schematic diagram of the subsequent pathways for IM1 in the presence of O<sub>2</sub> and NO<sub>2</sub>.

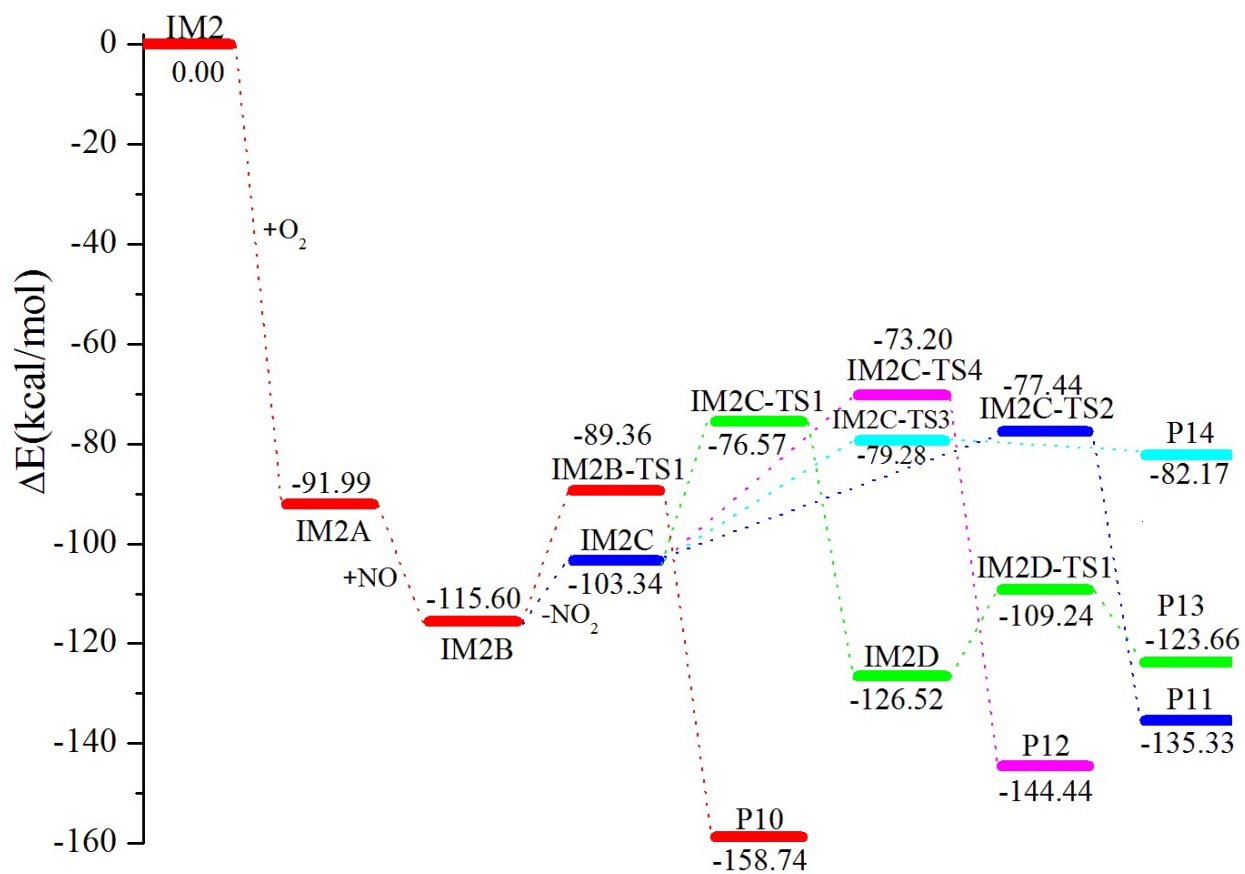

**Figure S2.** Schematic diagram of the subsequent pathways for IM2 in the presence of  $O_2$  and  $NO_2$ .

**Table S1.** The harmonic vibrational frequencies (imaginary frequency is suffixed with *i*) and the moment of inertia ( $I_a$ ,  $I_b$  and  $I_c$ ) of all the species in the  $\text{CH}_2=\text{C}=\text{CH}_2 + \text{NO}_3$  reaction.

| Species | Frequencies ( $\text{cm}^{-1}$ )                                                                                                                           | $I_a, I_b, I_c$ (amu bohr <sup>2</sup> ) |
|---------|------------------------------------------------------------------------------------------------------------------------------------------------------------|------------------------------------------|
| IM1     | 58, 71, 145, 191, 341, 426, 475, 604, 633, 760, 844, 895, 897, 915, 981, 1013, 1278, 1315, 1372, 1407, 1451, 1719, 1767, 3052, 3069, 3114, 3151            | 339.76624, 1026.36185, 1062.89707        |
| IM2     | 42, 79, 200, 373, 470, 488, 519, 532, 545, 725, 750, 780, 805, 824, 938, 955, 1026, 1265, 1329, 1366, 1480, 1505, 1740, 3160, 3166, 3266, 3268             | 325.63100, 957.44707, 985.45143          |
| IM3     | 81, 127, 209, 402, 478, 511, 592, 610, 649, 704, 778, 833, 882, 965, 1019, 1050, 1228, 1270, 1336, 1429, 1494, 1622, 1706, 3037, 3131, 3162, 3255          | 283.38746, 796.24919, 1050.77532         |
| IM4     | 78, 97, 172, 218, 283, 352, 455, 547, 641, 736, 781, 818, 884, 890, 999, 1090, 1161, 1284, 1347, 1386, 1451, 1724, 1814, 2900, 2999, 3191, 3278            | 454.96650, 819.44000, 1200.33737         |
| IM5     | 49, 59, 170, 271, 337, 399, 409, 493, 503, 628, 776, 799, 844, 995, 1007, 1084, 1272, 1286, 1362, 1454, 1460, 1546, 1780, 3048, 3099, 3155, 3273           | 235.44318, 1328.74025, 1479.83823        |
| IM6     | 73, 88, 172, 203, 346, 418, 446, 519, 611, 712, 742, 769, 814, 887, 1019, 1065, 1112, 1340, 1409, 1472, 1482, 1694, 1741, 3035, 3094, 3127, 3281           | 338.64696, 934.69133, 1000.58633         |
| TS1     | 221 <i>i</i> , 39, 59, 135, 193, 336, 348, 365, 623, 678, 786, 834, 874, 909, 942, 1003, 1044, 1049, 1294, 1399, 1455, 1591, 1955, 3099, 3139, 3173, 3228  | 303.83023, 1310.46446, 1327.80125        |
| TS2     | 314 <i>i</i> , 63, 71, 123, 160, 253, 312, 385, 609, 680, 720, 793, 870, 894, 912, 977, 1031, 1056, 1290, 1404, 1449, 1576, 1885, 3128, 3135, 3227, 3228   | 343.49154, 1050.82503, 1182.19355        |
| TS3     | 351 <i>i</i> , 41, 59, 259, 271, 333, 393, 512, 696, 712, 721, 793, 892, 897, 940, 1027, 1037, 1045, 1133, 1401, 1455, 1522, 1903, 3122, 3142, 3211, 3235  | 311.71580, 927.62244, 1212.84791         |
| TS4     | 652 <i>i</i> , 65, 95, 163, 246, 295, 388, 426, 470, 497, 615, 731, 774, 812, 889, 917, 968, 998, 1151, 1308, 1367, 1453, 1760, 1995, 3101, 3176, 3183     | 293.30251, 1039.01431, 1217.19420        |
| TS5     | 1803 <i>i</i> , 63, 99, 142, 270, 302, 355, 546, 598, 668, 719, 793, 843, 881, 975, 1081, 1089, 1161, 1282, 1350, 1435, 1613, 1765, 2130, 3067, 3080, 3194 | 174.63328, 1425.91991, 1551.37502        |

|      |                                                                                                                                                                  |                                   |
|------|------------------------------------------------------------------------------------------------------------------------------------------------------------------|-----------------------------------|
| TS6  | 612 <i>i</i> , 105, 126, 219, 302, 473, 494, 567, 578, 714, 794, 860, 902, 933, 978, 1022, 1128, 1189, 1328, 1410, 1470, 1560, 1789, 3045, 3061, 3104, 3156      | 330.29858, 829.92243, 1034.18617  |
| TS7  | 764 <i>i</i> , 123, 157, 332, 421, 493, 538, 580, 631, 683, 730, 756, 875, 900, 917, 958, 1021, 1053, 1251, 1417, 1464, 1542, 1697, 3149, 3163, 3259, 3260       | 293.36798, 810.19633, 996.14673   |
| TS8  | 235 <i>i</i> , 85, 180, 278, 449, 460, 475, 528, 613, 713, 737, 859, 863, 962, 991, 1077, 1183, 1259, 1334, 1422, 1468, 1698, 1774, 2982, 3028, 3161, 3253       | 354.96814, 762.21606, 1084.92023  |
| TS9  | 353 <i>i</i> , 78, 93, 119, 147, 257, 343, 451, 503, 576, 672, 748, 830, 919, 943, 947, 1053, 1180, 1305, 1468, 1482, 1515, 1607, 3146, 3157, 3257, 3271         | 343.15150, 1087.44677, 1243.65003 |
| TS10 | 775 <i>i</i> , 76, 144, 155, 228, 257, 298, 319, 419, 482, 581, 655, 703, 740, 887, 905, 991, 1008, 1304, 1349, 1426, 1633, 1683, 1887, 2922, 3157, 3254         | 441.11643, 814.53663, 1186.33033  |
| TS11 | 666 <i>i</i> , 51, 68, 180, 245, 254, 273, 300, 351, 472, 558, 641, 657, 689, 881, 1026, 1122, 1198, 1255, 1436, 1479, 1875, 1935, 3021, 3142, 3170, 3260        | 314.38491, 1077.88079, 1330.37076 |
| TS12 | 2114 <i>i</i> , 75, 108, 131, 186, 236, 333, 399, 444, 526, 638, 702, 846, 877, 884, 989, 9788, 1099, 1176, 1271, 1365, 1399, 1690, 1819, 1879, 3043, 3098, 3199 | 223.52896, 1462.90196, 1623.85459 |
| TS13 | 1862 <i>i</i> , 83, 105, 133, 228, 333, 376, 399, 563, 608, 690, 775, 827, 895, 937, 966, 1133, 1162, 1237, 1325, 1424, 1665, 1865, 1911, 3111, 3156, 3247       | 351.47486, 1098.76665, 1192.01586 |
| TS14 | 2172 <i>i</i> , 68, 87, 189, 388, 429, 456, 462, 601, 665, 735, 753, 810, 893, 940, 976, 1054, 1076, 1223, 1347, 1432, 1665, 1755, 1829, 3083, 3184, 3189,       | 294.08221, 968.43179, 1096.99999  |
| TS15 | 313 <i>i</i> , 49, 69, 110, 125, 286, 364, 391, 465, 529, 708, 744, 808, 955, 1000, 1047, 1223, 1358, 1395, 1433, 1474, 1496, 1791, 3031, 3091, 3122, 3221       | 366.39285, 1096.61258, 1130.54421 |
| TS16 | 443 <i>i</i> , 40, 70, 104, 125, 200, 325, 363, 408, 494, 497, 541, 547, 571, 651, 781, 835, 1078, 1353, 1410, 1412, 1841, 2003, 3097, 3269, 3269, 3462          | 365.59125, 1058.90116, 1412.10029 |
| TS17 | 353 <i>i</i> , 78, 93, 119, 147, 257, 343, 451, 503, 576, 672, 748, 830, 919, 943, 947, 1053, 1180, 1305, 1468, 1482, 1515, 1607, 3146, 3157, 3257, 3271         | 343.15150, 1087.44677, 1243.65003 |

**Table S2.** Zero Point Energies (ZPE) without scaling factor,  $T_1$  diagnostic values, relative Energies ( $\Delta E$ ), relative enthalpies ( $\Delta H$ ) and Gibbs free energy ( $\Delta G$ ) for the species involved in the subsequent reaction of IM1 and IM2 (energies in kcal/mol).

| Species                                                          | ZPE   | $T_1$                   | $\Delta E$ | $\Delta H$ | $\Delta G$ |
|------------------------------------------------------------------|-------|-------------------------|------------|------------|------------|
| IM1A                                                             | 51.86 | 0.026                   | -92.89     | -94.93     | -55.74     |
| IM1B                                                             | 57.01 | 0.020                   | -117.69    | -120.46    | -81.27     |
| IM1C                                                             | 48.88 | 0.024                   | -132.19    | -134.49    | -95.30     |
| IM2A                                                             | 51.74 | 0.024                   | -91.99     | -93.92     | -54.73     |
| IM2B                                                             | 56.72 | 0.020                   | -115.60    | -118.29    | -79.10     |
| IM2C                                                             | 48.26 | 0.022                   | -103.34    | -105.63    | -66.44     |
| IM2D                                                             | 48.44 | 0.024                   | -126.52    | -128.60    | -89.42     |
| IM1B-TS1                                                         | 52.46 | 0.044                   | -76.26     | -78.99     | -39.80     |
| IM1B-TS2                                                         | 56.44 | 0.022                   | -102.56    | -105.69    | -66.40     |
| IM1C-TS1                                                         | 46.16 | 0.024                   | -94.68     | -96.52     | -57.33     |
| IM1C-TS2                                                         | 44.41 | 0.032                   | -91.46     | -93.73     | -54.54     |
| IM2B-TS1                                                         | 54.78 | 0.025                   | -89.36     | -92.34     | -53.15     |
| IM2C-TS1                                                         | 45.52 | 0.032                   | -76.57     | -78.96     | -39.78     |
| IM2C-TS2                                                         | 45.44 | 0.036                   | -77.44     | -79.03     | -39.84     |
| IM2C-TS3                                                         | 43.14 | 0.026                   | -79.28     | -81.31     | -42.12     |
| IM2C-TS4                                                         | 44.81 | 0.033                   | -73.20     | -75.92     | -36.74     |
| IM2D-TS1                                                         | 45.65 | 0.036                   | -109.24    | -110.56    | -71.37     |
| P9: (CH <sub>2</sub> COONOCHO + HONO)                            | 51.28 | 0.020<br>0.021          | -134.42    | -136.86    | -100.29    |
| P10: (CH <sub>2</sub> CONO <sub>2</sub> CHO + HONO)              | 54.84 | 0.018<br>0.021          | -158.74    | -160.84    | -124.27    |
| P11: (CH <sub>2</sub> CO + CH <sub>2</sub> O + NO <sub>2</sub> ) | 41.92 | 0.017<br>0.015<br>0.024 | -135.33    | -135.42    | -166.20    |
| P12: (CH <sub>2</sub> COCHO + HONO)                              | 45.23 | 0.034<br>0.021          | -144.44    | -145.64    | -126.17    |
| P13: (cy-CH <sub>2</sub> COCHOH + NO <sub>2</sub> )              | 46.35 | 0.014<br>0.024          | -123.66    | -125.01    | -122.71    |
| P14: (CH <sub>2</sub> CONO <sub>2</sub> CHO + H)                 | 42.19 | 0.018                   | -82.17     | -82.98     | -71.66     |



**Table S3.** Calculated total rate constants and tropospheric lifetime ( $\tau$ ) at different temperatures (in K) and heights (in km) in the Earth atmosphere (in  $\text{cm}^3 \text{ molecule}^{-1} \text{ s}^{-1}$ )

| $T$ | Altitude | $k_{\text{tot}}$       | $\tau$ (days) |
|-----|----------|------------------------|---------------|
| 200 | 12       | $1.56 \times 10^{-16}$ | 130.16        |
| 217 | 10       | $3.10 \times 10^{-16}$ | 65.5          |
| 223 | 9        | $3.87 \times 10^{-16}$ | 52.47         |
| 230 | 8        | $4.96 \times 10^{-16}$ | 40.94         |
| 236 | 7        | $6.08 \times 10^{-16}$ | 33.4          |
| 243 | 6        | $7.62 \times 10^{-16}$ | 26.65         |
| 249 | 5        | $9.18 \times 10^{-16}$ | 22.12         |
| 256 | 4        | $1.13 \times 10^{-15}$ | 17.97         |
| 262 | 3        | $1.34 \times 10^{-15}$ | 15.15         |
| 269 | 2        | $1.63 \times 10^{-15}$ | 12.46         |
| 275 | 1        | $1.90 \times 10^{-15}$ | 10.69         |
| 282 | 0        | $2.27 \times 10^{-15}$ | 8.95          |
| 288 | 0        | $2.65 \times 10^{-15}$ | 7.66          |
| 296 | 0        | $3.19 \times 10^{-15}$ | 6.36          |
| 298 | 0        | $3.34 \times 10^{-15}$ | 6.08          |

**Table S4** The Cartesian coordinates, thermal correction to Enthalpy, thermal

correction to Gibbs Free Energy and the energy at the CCSD(T)/cc-pVTZ level of all the intermediates and transition states in the  $\text{CH}_2=\text{C}=\text{CH}_2 + \text{NO}_3$  and subsequent reactions.

| Species |   | Coordinates(Atom, X, Y, Z) |          |          | Thermal correction to Enthalpy | Thermal correction to Gibbs Free Energy | E            |
|---------|---|----------------------------|----------|----------|--------------------------------|-----------------------------------------|--------------|
| IM1     | C | -0.83162                   | 1.14757  | -0.04294 | 0.081052                       | 0.039759                                | -396.3101771 |
|         | N | 1.23898                    | -0.11207 | 0.06937  |                                |                                         |              |
|         | O | 1.06826                    | -0.07222 | 1.26906  |                                |                                         |              |
|         | O | 0.30302                    | 0.57073  | -0.76294 |                                |                                         |              |
|         | O | 2.10911                    | -0.6471  | -0.57142 |                                |                                         |              |
|         | H | -1.14903                   | 1.95102  | -0.71546 |                                |                                         |              |
|         | H | -0.4748                    | 1.58909  | 0.89083  |                                |                                         |              |
|         | C | -1.91071                   | 0.17636  | 0.18522  |                                |                                         |              |
|         | C | -2.26626                   | -1.05297 | -0.09286 |                                |                                         |              |
|         | H | -1.64274                   | -1.71003 | -0.70775 |                                |                                         |              |
|         | H | -3.19785                   | -1.48258 | 0.27251  |                                |                                         |              |
| IM2     | C | -1.16261                   | -0.00012 | -0.20102 | 0.072012                       | 0.079990                                | -396.34657   |
|         | C | -1.72771                   | -1.24002 | 0.03308  |                                |                                         |              |
|         | H | -1.19029                   | -2.14998 | -0.20387 |                                |                                         |              |
|         | C | -1.72731                   | 1.24023  | 0.03176  |                                |                                         |              |
|         | H | -2.72462                   | -1.31873 | 0.45147  |                                |                                         |              |
|         | H | -2.72413                   | 1.3198   | 0.4502   |                                |                                         |              |
|         | H | -1.18957                   | 2.14972  | -0.20627 |                                |                                         |              |
|         | N | 1.22933                    | 0.00002  | 0.09474  |                                |                                         |              |
|         | O | 0.98088                    | 0.00094  | 1.27614  |                                |                                         |              |
|         | O | 2.28177                    | -0.00046 | -0.48775 |                                |                                         |              |
|         | O | 0.10349                    | -0.00067 | -0.8306  |                                |                                         |              |
| IM3     | C | -0.56159                   | 1.2499   | 0.1179   | 0.081683                       | 0.042807                                | -396.3531703 |
|         | H | -0.66558                   | 1.64887  | 1.13531  |                                |                                         |              |
|         | H | -1.01086                   | 1.94126  | -0.59787 |                                |                                         |              |
|         | O | 0.81527                    | 1.12602  | -0.2303  |                                |                                         |              |
|         | C | -1.1207                    | -0.16026 | 0.00856  |                                |                                         |              |
|         | O | -0.09263                   | -1.04755 | -0.00118 |                                |                                         |              |
|         | N | 1.1976                     | -0.18201 | 0.27817  |                                |                                         |              |
|         | O | 2.23696                    | -0.63198 | -0.09919 |                                |                                         |              |
|         | C | -2.40244                   | -0.51779 | -0.06501 |                                |                                         |              |
|         | H | -2.69864                   | -1.55937 | -0.09907 |                                |                                         |              |
|         | H | -3.1765                    | 0.24019  | -0.10893 |                                |                                         |              |
| IM4     | C | -0.71354                   | 1.26044  | 0.1524   | 0.080275                       | 0.039313                                | -396.3405625 |

|     |   |          |          |          |          |          |              |
|-----|---|----------|----------|----------|----------|----------|--------------|
|     | H | -0.88032 | 1.59645  | 1.1852   |          |          |              |
|     | H | -1.36914 | 1.83802  | -0.51184 |          |          |              |
|     | O | 0.59582  | 1.4738   | -0.26095 |          |          |              |
|     | C | -1.05853 | -0.22369 | 0.01063  |          |          |              |
|     | O | 0.05643  | -1.01861 | -0.07367 |          |          |              |
|     | N | 1.1758   | -0.27161 | 0.27434  |          |          |              |
|     | O | 2.17525  | -0.71438 | -0.10286 |          |          |              |
|     | C | -2.27333 | -0.75927 | -0.04924 |          |          |              |
|     | H | -2.41724 | -1.82932 | -0.11143 |          |          |              |
|     | H | -3.1452  | -0.11855 | -0.04879 |          |          |              |
| IM5 | C | -0.49693 | 1.07934  | 0.35421  | 0.080386 | 0.038607 | -396.3985285 |
|     | H | -0.4109  | 1.2712   | 1.42934  |          |          |              |
|     | H | -0.956   | 1.94503  | -0.12984 |          |          |              |
|     | O | 0.81407  | 1.004    | -0.23805 |          |          |              |
|     | C | -1.32663 | -0.20031 | 0.15744  |          |          |              |
|     | O | -1.0805  | -1.19932 | 0.85438  |          |          |              |
|     | N | 1.48173  | -0.24037 | 0.09182  |          |          |              |
|     | O | 2.54628  | -0.26363 | -0.40617 |          |          |              |
|     | C | -2.37616 | -0.22127 | -0.80851 |          |          |              |
|     | H | -2.96528 | -1.12653 | -0.91119 |          |          |              |
|     | H | -2.61049 | 0.63354  | -1.4354  |          |          |              |
| IM6 | C | 1.25114  | -0.21521 | 0.05231  | 0.080491 | 0.039633 | -396.3089064 |
|     | C | 2.09168  | -1.00207 | -0.58242 |          |          |              |
|     | H | 2.17223  | -1.97771 | -1.03658 |          |          |              |
|     | C | 1.71785  | 1.11751  | 0.57658  |          |          |              |
|     | H | 2.77604  | 1.2188   | 0.33185  |          |          |              |
|     | H | 1.17476  | 1.95335  | 0.12437  |          |          |              |
|     | H | 1.60464  | 1.17833  | 1.6664   |          |          |              |
|     | N | -1.19402 | 0.05098  | -0.06791 |          |          |              |
|     | O | -0.9687  | 1.01043  | -0.76557 |          |          |              |
|     | O | -2.23549 | -0.39521 | 0.33656  |          |          |              |
|     | O | -0.03462 | -0.73451 | 0.38532  |          |          |              |
| TS1 | C | -1.16954 | 1.15794  | 0.22294  | 0.078099 | 0.035767 | -396.2742434 |
|     | N | 1.4322   | -0.11728 | 0.04071  |          |          |              |
|     | O | 1.15045  | -0.32641 | 1.21077  |          |          |              |
|     | O | 0.55558  | 0.50274  | -0.76299 |          |          |              |
|     | O | 2.47194  | -0.41199 | -0.5356  |          |          |              |
|     | H | -1.21359 | 2.02546  | -0.42992 |          |          |              |
|     | H | -0.65209 | 1.26974  | 1.17007  |          |          |              |
|     | C | -2.00133 | 0.12288  | 0.02802  |          |          |              |
|     | C | -2.73994 | -0.91947 | -0.20316 |          |          |              |
|     | H | -2.34567 | -1.77834 | -0.74644 |          |          |              |
|     | H | -3.77291 | -0.97872 | 0.13706  |          |          |              |

|     |          |          |          |          |          |          |              |
|-----|----------|----------|----------|----------|----------|----------|--------------|
| TS2 | C        | 1.6355   | -0.03361 | -0.01582 | 0.077557 | 0.035330 | -396.2724481 |
|     | C        | 1.68977  | 1.26471  | -0.35638 |          |          |              |
|     | H        | 1.03231  | 1.98265  | 0.12393  |          |          |              |
|     | C        | 1.93473  | -1.23447 | 0.40563  |          |          |              |
|     | H        | 2.3129   | 1.60119  | -1.18204 |          |          |              |
|     | H        | 2.81931  | -1.3893  | 1.02007  |          |          |              |
|     | H        | 1.30847  | -2.09101 | 0.18122  |          |          |              |
|     | N        | -1.29444 | 0.02354  | 0.03818  |          |          |              |
|     | O        | -1.03582 | 0.76453  | 0.97552  |          |          |              |
|     | O        | -2.38957 | -0.43785 | -0.25866 |          |          |              |
| O   | -0.3211  | -0.35769 | -0.79323 |          |          |          |              |
| TS3 | C        | 1.53497  | 0.09767  | 0.00213  | 0.078074 | 0.037166 | -396.2672579 |
|     | C        | 1.03983  | 1.37723  | 0.05933  |          |          |              |
|     | N        | -1.22013 | -0.17429 | 0.00618  |          |          |              |
|     | O        | -0.97186 | 1.09505  | -0.06595 |          |          |              |
|     | O        | -0.25077 | -0.98794 | 0.16008  |          |          |              |
|     | O        | -2.37351 | -0.5617  | -0.07079 |          |          |              |
|     | H        | 0.94407  | 1.88434  | 1.01446  |          |          |              |
|     | H        | 1.02979  | 2.00164  | -0.82897 |          |          |              |
|     | C        | 2.39255  | -0.88098 | -0.08895 |          |          |              |
|     | H        | 3.461    | -0.67485 | -0.13038 |          |          |              |
| H   | 2.07102  | -1.91788 | -0.12013 |          |          |          |              |
| TS4 | C        | -0.75297 | 1.06355  | 0.24587  | 0.072047 | 0.030666 | -396.2315166 |
|     | N        | 1.28297  | -0.25391 | -0.00782 |          |          |              |
|     | O        | 0.67661  | -1.17891 | 0.46769  |          |          |              |
|     | O        | 0.56999  | 1.0122   | -0.19807 |          |          |              |
|     | O        | 2.41886  | -0.16367 | -0.39102 |          |          |              |
|     | H        | -0.96318 | 2.04348  | 0.66332  |          |          |              |
|     | H        | -0.45981 | 0.62609  | 2.17964  |          |          |              |
|     | C        | -1.70804 | 0.21951  | -0.11312 |          |          |              |
|     | C        | -2.66131 | -0.64721 | -0.30561 |          |          |              |
|     | H        | -2.87573 | -1.42531 | 0.42753  |          |          |              |
| H   | -3.27181 | -0.63892 | -1.20748 |          |          |          |              |
| TS5 | C        | 0.77523  | 0.13988  | 0.3659   | 0.075384 | 0.034597 | -396.2357106 |
|     | N        | -1.58367 | 0.03331  | -0.03685 |          |          |              |
|     | O        | -1.5179  | 1.23913  | -0.06108 |          |          |              |
|     | O        | -0.29529 | -0.69839 | 0.11486  |          |          |              |
|     | O        | -2.51811 | -0.71586 | -0.09651 |          |          |              |
|     | H        | 0.6863   | 0.77685  | 1.2505   |          |          |              |
|     | H        | 1.09838  | 0.70142  | -0.79134 |          |          |              |
|     | C        | 1.98088  | -0.14589 | -0.31684 |          |          |              |
|     | C        | 3.28696  | -0.03578 | -0.04835 |          |          |              |
|     | H        | 4.02508  | 0.14018  | -0.82576 |          |          |              |

|     |   |          |          |          |          |          |              |
|-----|---|----------|----------|----------|----------|----------|--------------|
|     | H | 3.66788  | -0.19988 | 0.96214  |          |          |              |
| TS6 | C | 1.31265  | -0.05448 | -0.0354  | 0.078802 | 0.039989 | -396.2761473 |
|     | C | 0.66855  | 1.24937  | 0.109    |          |          |              |
|     | H | 0.95793  | 1.9601   | -0.67123 |          |          |              |
|     | C | 2.4128   | -0.70206 | -0.31769 |          |          |              |
|     | H | 3.32893  | -0.19054 | -0.62841 |          |          |              |
|     | H | 2.4666   | -1.78809 | -0.25704 |          |          |              |
|     | N | -1.18498 | -0.21938 | 0.13266  |          |          |              |
|     | O | -0.78814 | 1.12495  | -0.05514 |          |          |              |
|     | O | -2.10791 | -0.61222 | -0.56249 |          |          |              |
|     | O | -0.31375 | -0.89864 | 0.74201  |          |          |              |
|     | H | 0.85582  | 1.68452  | 1.09758  |          |          |              |
| TS7 | C | 0.82211  | 0.27257  | -0.42543 | 0.078620 | 0.040795 | -396.2951493 |
|     | C | 0.27611  | 1.36768  | 0.41159  |          |          |              |
|     | N | -1.42648 | -0.28429 | -0.19848 |          |          |              |
|     | O | -0.20371 | -0.77113 | -0.59799 |          |          |              |
|     | O | -1.50018 | 0.95932  | -0.30549 |          |          |              |
|     | O | -2.12937 | -1.01936 | 0.46284  |          |          |              |
|     | H | 0.4171   | 2.3939   | 0.10199  |          |          |              |
|     | H | 0.12044  | 1.18311  | 1.4708   |          |          |              |
|     | C | 2.02376  | 0.07415  | -0.90789 |          |          |              |
|     | H | 2.38584  | 0.89188  | -1.56228 |          |          |              |
|     | H | 2.59333  | -0.80918 | -0.70737 |          |          |              |
| TS8 | C | -0.73413 | 1.25775  | 0.16131  | 0.079738 | 0.041468 | -396.3424561 |
|     | H | -0.89893 | 1.58522  | 1.20116  |          |          |              |
|     | H | -1.41642 | 1.83091  | -0.4849  |          |          |              |
|     | O | 0.56065  | 1.50796  | -0.27326 |          |          |              |
|     | C | -1.04988 | -0.23242 | 0.01096  |          |          |              |
|     | O | 0.08117  | -1.00922 | -0.08961 |          |          |              |
|     | N | 1.25428  | -0.20607 | 0.29917  |          |          |              |
|     | O | 2.26884  | -0.66054 | -0.06453 |          |          |              |
|     | C | -2.25424 | -0.79685 | -0.0458  |          |          |              |
|     | H | -2.37533 | -1.87153 | -0.11781 |          |          |              |
|     | H | -3.14506 | -0.17856 | -0.03226 |          |          |              |
| TS9 | C | -0.92876 | 1.17927  | 0.49531  | 0.077183 | 0.035247 | -396.2973738 |
|     | H | -0.50117 | 1.39647  | 1.46455  |          |          |              |
|     | H | -1.22103 | 2.01776  | -0.12533 |          |          |              |
|     | O | 1.13923  | 1.02586  | -0.22929 |          |          |              |
|     | C | -1.28824 | -0.18321 | 0.17598  |          |          |              |
|     | O | -0.68657 | -1.1279  | 0.73753  |          |          |              |
|     | N | 1.48807  | -0.13775 | -0.05587 |          |          |              |
|     | O | 2.56506  | -0.61    | -0.27144 |          |          |              |
|     | C | -2.3352  | -0.32577 | -0.77176 |          |          |              |

|      |   |          |          |          |          |          |              |
|------|---|----------|----------|----------|----------|----------|--------------|
|      | H | -2.77297 | -1.30217 | -0.94365 |          |          |              |
|      | H | -2.74999 | 0.52671  | -1.29598 |          |          |              |
| TS10 | C | -1.12212 | 1.03553  | 0.0228   | 0.071509 | 0.029749 | -396.3153421 |
|      | H | -1.03661 | 0.97598  | 1.82664  |          |          |              |
|      | H | -2.18944 | 1.30671  | 0.15755  |          |          |              |
|      | O | -0.27677 | 1.87604  | -0.26817 |          |          |              |
|      | C | -0.87147 | -0.44174 | -0.06007 |          |          |              |
|      | O | 0.38653  | -0.83543 | -0.39116 |          |          |              |
|      | N | 1.45064  | -0.07091 | 0.42912  |          |          |              |
|      | O | 2.49796  | -0.292   | -0.013   |          |          |              |
|      | C | -1.87319 | -1.32687 | 0.06709  |          |          |              |
|      | H | -1.70204 | -2.39266 | -0.03269 |          |          |              |
|      | H | -2.88751 | -0.98423 | 0.24442  |          |          |              |
| TS11 | C | 0.26692  | 1.26463  | 0.22211  | 0.076504 | 0.033582 | -396.3383862 |
|      | H | 0.85144  | 2.05835  | -0.2357  |          |          |              |
|      | H | 0.2816   | 1.16685  | 1.31139  |          |          |              |
|      | O | -0.84368 | 0.97456  | -0.41005 |          |          |              |
|      | C | 1.45318  | -0.47695 | 0.02061  |          |          |              |
|      | O | 0.63767  | -1.35469 | 0.04703  |          |          |              |
|      | N | -1.70041 | -0.14744 | 0.43706  |          |          |              |
|      | O | -2.56605 | -0.53281 | -0.21678 |          |          |              |
|      | C | 2.70194  | -0.00001 | -0.09325 |          |          |              |
|      | H | 3.44346  | -0.62118 | -0.58903 |          |          |              |
|      | H | 2.97062  | 1.0055   | 0.19545  |          |          |              |
| TS12 | C | 0.2237   | -0.47652 | 0.16369  | 0.073512 | 0.031556 | -396.3164866 |
|      | H | 0.02396  | -1.00154 | 1.10721  |          |          |              |
|      | H | 1.05684  | -1.41253 | -0.45844 |          |          |              |
|      | O | -0.8819  | 0.08807  | -0.39743 |          |          |              |
|      | C | 1.54883  | 0.26446  | 0.1187   |          |          |              |
|      | O | 1.7876   | 1.44488  | 0.10101  |          |          |              |
|      | N | -2.12966 | -0.25664 | 0.38295  |          |          |              |
|      | O | -3.07312 | 0.14777  | -0.17003 |          |          |              |
|      | C | 2.43498  | -0.93103 | -0.16238 |          |          |              |
|      | H | 2.80063  | -1.50838 | 0.68842  |          |          |              |
|      | H | 3.12054  | -0.86819 | -1.00635 |          |          |              |
| TS13 | C | -0.34736 | -0.85061 | 0.60192  | 0.074758 | 0.033785 | -396.3099948 |
|      | H | -0.88275 | -1.52765 | -0.45933 |          |          |              |
|      | H | -0.66194 | -1.44059 | 1.46562  |          |          |              |
|      | O | 1.00793  | -0.64897 | 0.64603  |          |          |              |
|      | C | -1.31045 | 0.13771  | 0.05595  |          |          |              |
|      | O | -1.79689 | -0.69104 | -0.92286 |          |          |              |
|      | N | 1.4829   | 0.28335  | -0.46215 |          |          |              |
|      | O | 2.62018  | 0.47886  | -0.33097 |          |          |              |

|      |   |          |          |          |          |          |              |
|------|---|----------|----------|----------|----------|----------|--------------|
|      | C | -1.65855 | 1.3879   | 0.36169  |          |          |              |
|      | H | -2.42539 | 1.91326  | -0.19713 |          |          |              |
|      | H | -1.16182 | 1.91077  | 1.17093  |          |          |              |
| TS14 | C | 1.07314  | -0.25313 | 0.07173  | 0.074565 | 0.034633 | -396.2409157 |
|      | C | 2.10791  | -0.84957 | -0.50489 |          |          |              |
|      | H | 2.34281  | -1.80684 | -0.9627  |          |          |              |
|      | C | 1.67096  | 1.04542  | 0.51508  |          |          |              |
|      | H | 2.73533  | 0.36539  | -0.1118  |          |          |              |
|      | H | 1.43283  | 1.94518  | -0.05097 |          |          |              |
|      | H | 1.85116  | 1.19462  | 1.5816   |          |          |              |
|      | N | -1.29824 | 0.03259  | -0.06992 |          |          |              |
|      | O | -1.04184 | 1.01671  | -0.72082 |          |          |              |
|      | O | -2.34493 | -0.4196  | 0.30455  |          |          |              |
|      | O | -0.16154 | -0.79497 | 0.359    |          |          |              |
| TS15 | C | 1.27592  | 0.093    | -0.23924 | 0.077835 | 0.035011 | -396.2870604 |
|      | C | 1.75497  | 1.35751  | -0.0002  |          |          |              |
|      | H | 1.42731  | 2.32645  | -0.36274 |          |          |              |
|      | C | 1.87152  | -1.14738 | 0.37638  |          |          |              |
|      | H | 2.79947  | -0.92678 | 0.91089  |          |          |              |
|      | H | 1.15765  | -1.58664 | 1.08425  |          |          |              |
|      | H | 2.06763  | -1.89359 | -0.40093 |          |          |              |
|      | N | -1.42194 | -0.00399 | 0.08866  |          |          |              |
|      | O | -1.22041 | 0.40115  | 1.19894  |          |          |              |
|      | O | -2.39258 | -0.35525 | -0.51059 |          |          |              |
|      | O | 0.24888  | -0.00968 | -1.02257 |          |          |              |
| TS16 | C | 0.90654  | 0.48483  | 0.00002  | 0.075304 | 0.030649 | -396.2319537 |
|      | C | 1.21047  | 1.67712  | -0.00016 |          |          |              |
|      | H | 1.72125  | 2.61268  | -0.00103 |          |          |              |
|      | C | 2.76445  | -1.01194 | 0.00024  |          |          |              |
|      | H | 3.57309  | -0.29061 | -0.0022  |          |          |              |
|      | H | 2.53648  | -1.51957 | 0.93056  |          |          |              |
|      | H | 2.5335   | -1.52249 | -0.92774 |          |          |              |
|      | N | -1.44922 | -0.14008 | 0.00004  |          |          |              |
|      | O | -1.68041 | 1.02864  | 0.00044  |          |          |              |
|      | O | -2.11839 | -1.1278  | -0.0002  |          |          |              |
|      | O | 0.11023  | -0.55077 | -0.0003  |          |          |              |
| TS17 | C | 1.35084  | 0.70845  | -0.00037 | 0.072182 | 0.028186 | -396.2594586 |
|      | N | -1.825   | -0.04687 | 0.00006  |          |          |              |
|      | O | -0.72012 | -0.81871 | -0.00034 |          |          |              |
|      | O | -1.70226 | 1.16863  | 0.00034  |          |          |              |
|      | O | -2.86123 | -0.69037 | 0.00007  |          |          |              |
|      | H | 0.97755  | 1.72751  | -0.00097 |          |          |              |
|      | H | 0.35704  | -0.05637 | -0.00002 |          |          |              |

|      |   |          |          |          |          |          |              |
|------|---|----------|----------|----------|----------|----------|--------------|
|      | C | 2.51132  | 0.18713  | -0.0001  |          |          |              |
|      | C | 3.69118  | -0.43528 | 0.00031  |          |          |              |
|      | H | 4.19429  | -0.69061 | 0.93005  |          |          |              |
|      | H | 4.19496  | -0.69052 | -0.92908 |          |          |              |
| IM1A | C | -0.04302 | -0.33023 | 1.10281  | 0.092460 | 0.046322 | -546.5095261 |
|      | N | 1.95252  | -0.16673 | -0.23344 |          |          |              |
|      | O | 1.47206  | -1.08334 | -0.86079 |          |          |              |
|      | O | 1.22966  | 0.30165  | 0.92046  |          |          |              |
|      | O | 2.97452  | 0.44544  | -0.40069 |          |          |              |
|      | H | -0.254   | -0.15612 | 2.16301  |          |          |              |
|      | H | 0.02793  | -1.40739 | 0.93273  |          |          |              |
|      | C | -1.10956 | 0.27372  | 0.2223   |          |          |              |
|      | C | -1.10526 | 1.46962  | -0.35983 |          |          |              |
|      | H | -0.25914 | 2.13195  | -0.22477 |          |          |              |
|      | H | -1.9387  | 1.78755  | -0.97275 |          |          |              |
|      | O | -2.15871 | -0.64951 | 0.11884  |          |          |              |
|      | O | -3.22962 | -0.22268 | -0.5348  |          |          |              |
| IM1B | C | 0.96909  | -1.12285 | -0.64745 | 0.102883 | 0.051516 | -676.266867  |
|      | N | 2.57775  | 0.57088  | -0.07028 |          |          |              |
|      | O | 1.91659  | 1.28781  | -0.7865  |          |          |              |
|      | O | 2.18764  | -0.81087 | 0.035    |          |          |              |
|      | O | 3.55392  | 0.81194  | 0.59068  |          |          |              |
|      | H | 1.03545  | -2.20508 | -0.7975  |          |          |              |
|      | H | 0.9358   | -0.63445 | -1.62453 |          |          |              |
|      | C | -0.2533  | -0.76084 | 0.16923  |          |          |              |
|      | C | -0.28808 | -0.52792 | 1.47728  |          |          |              |
|      | H | 0.63076  | -0.58175 | 2.04729  |          |          |              |
|      | H | -1.20752 | -0.29704 | 1.9973   |          |          |              |
|      | O | -1.32212 | -0.75777 | -0.71127 |          |          |              |
|      | O | -2.55668 | -0.57272 | -0.02877 |          |          |              |
|      | N | -2.92382 | 0.86754  | -0.24864 |          |          |              |
|      | O | -3.97163 | 1.0565   | 0.22779  |          |          |              |
| IM1C | C | 0.54995  | -0.86848 | -0.63914 | 0.086758 | 0.043486 | -471.4841158 |
|      | N | -1.55274 | -0.03981 | 0.17515  |          |          |              |
|      | O | -1.1418  | -0.41195 | 1.25362  |          |          |              |
|      | O | -0.70628 | -0.24649 | -0.9599  |          |          |              |
|      | O | -2.58944 | 0.49737  | -0.12027 |          |          |              |
|      | H | 0.90152  | -1.22204 | -1.61356 |          |          |              |
|      | H | 0.40672  | -1.72705 | 0.01927  |          |          |              |
|      | C | 1.60029  | 0.06699  | -0.02888 |          |          |              |
|      | C | 1.4132   | 1.48325  | -0.06877 |          |          |              |
|      | H | 0.5506   | 1.94376  | -0.53746 |          |          |              |
|      | H | 2.17875  | 2.11254  | 0.37125  |          |          |              |



|      |          |          |          |          |          |          |              |
|------|----------|----------|----------|----------|----------|----------|--------------|
|      | O        | 2.61889  | -0.45382 | 0.44595  |          |          |              |
| IM2A | C        | -0.32656 | 0.69078  | 0.01974  | 0.092440 | 0.045989 | -546.5079965 |
|      | C        | -1.10661 | -0.2958  | 0.83062  |          |          |              |
|      | H        | -0.46414 | -1.01913 | 1.33572  |          |          |              |
|      | C        | -0.62946 | 1.97945  | -0.12211 |          |          |              |
|      | H        | -1.75243 | 0.20704  | 1.55193  |          |          |              |
|      | H        | -1.49404 | 2.40182  | 0.37745  |          |          |              |
|      | H        | -0.03562 | 2.62673  | -0.75852 |          |          |              |
|      | N        | 1.89499  | -0.2228  | -0.02165 |          |          |              |
|      | O        | 1.88559  | -0.00817 | 1.16889  |          |          |              |
|      | O        | 2.73319  | -0.70771 | -0.72884 |          |          |              |
|      | O        | 0.69702  | 0.16282  | -0.7753  |          |          |              |
|      | O        | -1.96549 | -1.12748 | -0.02634 |          |          |              |
|      | O        | -2.99319 | -0.4324  | -0.47898 |          |          |              |
| IM2B | C        | 0.33496  | -0.62784 | 0.59809  | 0.102547 | 0.050954 | -676.2633032 |
|      | C        | -0.18506 | -1.24748 | -0.66863 |          |          |              |
|      | H        | 0.6202   | -1.40624 | -1.39233 |          |          |              |
|      | C        | 0.09167  | -1.0639  | 1.83246  |          |          |              |
|      | H        | -0.66539 | -2.2076  | -0.45463 |          |          |              |
|      | H        | -0.53618 | -1.93287 | 1.99845  |          |          |              |
|      | H        | 0.49996  | -0.5539  | 2.69837  |          |          |              |
|      | N        | 2.3604   | 0.46016  | -0.10398 |          |          |              |
|      | O        | 2.76564  | -0.66134 | -0.30979 |          |          |              |
|      | O        | 2.88021  | 1.52786  | -0.27212 |          |          |              |
|      | O        | 1.01364  | 0.58817  | 0.45541  |          |          |              |
|      | O        | -1.08678 | -0.39278 | -1.38571 |          |          |              |
|      | O        | -2.32457 | -0.36002 | -0.67124 |          |          |              |
| N    | -2.37265 | 0.94272  | 0.03057  |          |          |          |              |
| O    | -3.40842 | 1.03759  | 0.57     |          |          |          |              |
| IM2C | C        | -0.88943 | 0.57797  | -0.0747  | 0.085773 | 0.042457 | -471.4402272 |
|      | C        | -1.5387  | -0.71674 | 0.37489  |          |          |              |
|      | H        | -1.00612 | -1.1071  | 1.26947  |          |          |              |
|      | C        | -1.45087 | 1.78247  | -0.00737 |          |          |              |
|      | H        | -2.57073 | -0.52629 | 0.7196   |          |          |              |
|      | H        | -2.46003 | 1.90101  | 0.37332  |          |          |              |
|      | H        | -0.92669 | 2.66778  | -0.35042 |          |          |              |
|      | N        | 1.43669  | -0.00456 | 0.08704  |          |          |              |
|      | O        | 1.22081  | -0.13768 | 1.27146  |          |          |              |
|      | O        | 2.43555  | -0.1841  | -0.55246 |          |          |              |
|      | O        | 0.33234  | 0.46579  | -0.74102 |          |          |              |
| O    | -1.46612 | -1.73972 | -0.52524 |          |          |          |              |
| IM2D | C        | -1.07937 | 0.52341  | -0.10958 | 0.086369 | 0.043335 | -471.4749801 |
|      | C        | -1.61867 | -0.75249 | 0.02901  |          |          |              |

|          |   |             |             |             |          |          |              |
|----------|---|-------------|-------------|-------------|----------|----------|--------------|
|          | H | -0.63213    | -2.36133    | 0.42906     |          |          |              |
|          | C | -1.74753    | 1.69522     | 0.16171     |          |          |              |
|          | H | -2.6327     | -0.87236    | 0.4002      |          |          |              |
|          | H | -2.78247    | 1.67122     | 0.4758      |          |          |              |
|          | H | -1.26028    | 2.6505      | 0.03148     |          |          |              |
|          | N | 1.30482     | 0.13391     | 0.12213     |          |          |              |
|          | O | 1.0587      | -0.22108    | 1.24413     |          |          |              |
|          | O | 2.33324     | 0.14843     | -0.48257    |          |          |              |
|          | O | 0.19835     | 0.6607      | -0.6738     |          |          |              |
|          | O | -0.937      | -1.87417    | -0.33946    |          |          |              |
| IM1B-TS1 | C | 0.96562     | -1.07968    | -0.71162    | 0.095704 | 0.044570 | -676.19802   |
|          | N | 3.06637     | 0.32693     | -1.04881    |          |          |              |
|          | O | 2.4009      | 0.55074     | -2.02503    |          |          |              |
|          | O | 2.19079     | -0.80543    | -0.02474    |          |          |              |
|          | O | 4.12529     | 0.62392     | -0.58082    |          |          |              |
|          | H | 1.03583     | -2.14682    | -0.93412    |          |          |              |
|          | H | 1.42806     | -0.26104    | -1.60938    |          |          |              |
|          | C | -0.24804    | -0.78607    | 0.14135     |          |          |              |
|          | C | -0.27614    | -0.65434    | 1.46084     |          |          |              |
|          | H | 0.64507     | -0.75275    | 2.01705     |          |          |              |
|          | H | -1.19237    | -0.46628    | 1.99905     |          |          |              |
|          | O | -1.3241     | -0.7157     | -0.72641    |          |          |              |
|          | O | -2.55193    | -0.56774    | -0.039      |          |          |              |
|          | N | -2.9549     | 0.89437     | -0.21191    |          |          |              |
|          | O | -3.99459    | 1.05074     | 0.2556      |          |          |              |
| IM1B-TS2 | C | 0.53526000  | 0.32618800  | -0.86743100 | 0.101595 | 0.051313 | -676.2434689 |
|          | N | 2.76428200  | -0.12679200 | -0.07300400 |          |          |              |
|          | O | 2.74124300  | 1.02429400  | 0.30296400  |          |          |              |
|          | O | 1.60239500  | -0.62635800 | -0.75870100 |          |          |              |
|          | O | 3.62162600  | -0.96481500 | 0.02834100  |          |          |              |
|          | H | -0.04800600 | -0.03677300 | -1.72054200 |          |          |              |
|          | H | 0.92078800  | 1.31962700  | -1.10537000 |          |          |              |
|          | C | -0.34619100 | 0.38872000  | 0.36496200  |          |          |              |
|          | C | -0.31585200 | -0.50097100 | 1.39583200  |          |          |              |
|          | H | 0.41715500  | -1.30010200 | 1.44284800  |          |          |              |
|          | H | -1.01576800 | -0.38559700 | 2.21367800  |          |          |              |
|          | O | -1.25722100 | 1.33326700  | 0.36116400  |          |          |              |
|          | O | -2.67879500 | 0.69013400  | -0.48304800 |          |          |              |
|          | N | -2.88677900 | -0.44689400 | 0.11161400  |          |          |              |
|          | O | -3.86124800 | -1.06464500 | -0.25835300 |          |          |              |
| IM1C-TS1 | C | 0.38553     | -0.99037    | -0.55247    | 0.083092 | 0.038338 | -471.423992  |
|          | N | -1.68658    | -0.02061    | 0.16736     |          |          |              |
|          | O | -1.4196     | -0.46575    | 1.25237     |          |          |              |

|          |   |             |             |             |          |          |              |
|----------|---|-------------|-------------|-------------|----------|----------|--------------|
|          | O | -0.75264    | -0.35394    | -0.94098    |          |          |              |
|          | O | -2.59316    | 0.6563      | -0.22852    |          |          |              |
|          | H | 0.87307     | -1.42449    | -1.42015    |          |          |              |
|          | H | 0.34616     | -1.5504     | 0.37526     |          |          |              |
|          | C | 2.02295     | 0.28212     | 0.05316     |          |          |              |
|          | C | 1.49673     | 1.5065      | -0.04376    |          |          |              |
|          | H | 0.63216     | 1.71747     | -0.65479    |          |          |              |
|          | H | 1.92098     | 2.28981     | 0.57772     |          |          |              |
|          | O | 2.8407      | -0.54631    | 0.31824     |          |          |              |
| IM1C-TS2 | C | 0.55711     | -0.83371    | -0.65327    | 0.079668 | 0.037052 | -471.4164221 |
|          | N | -1.89929    | -1.10403    | -0.15952    |          |          |              |
|          | O | -1.25581    | -2.03472    | 0.37317     |          |          |              |
|          | O | -0.63274    | -0.21265    | -0.94395    |          |          |              |
|          | O | -2.97503    | -0.61028    | -0.33316    |          |          |              |
|          | H | 0.90837     | -1.16558    | -1.63283    |          |          |              |
|          | H | -0.05165    | -1.6843     | 0.02122     |          |          |              |
|          | C | 1.62253     | 0.06592     | -0.01901    |          |          |              |
|          | C | 1.44273     | 1.48165     | 0.02686     |          |          |              |
|          | H | 0.57432     | 1.96896     | -0.39736    |          |          |              |
|          | H | 2.2212      | 2.07729     | 0.48612     |          |          |              |
|          | O | 2.6446      | -0.4813     | 0.40352     |          |          |              |
| IM2B-TS1 | C | 0.68400200  | -1.13687200 | -0.09470700 | 0.099023 | 0.048414 | -676.2211926 |
|          | C | -0.42087100 | -0.79840200 | 0.87895100  |          |          |              |
|          | H | -0.13223900 | -0.96984300 | 1.92972300  |          |          |              |
|          | C | 0.57421800  | -1.90461800 | -1.17076200 |          |          |              |
|          | H | -0.60729900 | 0.31824100  | 0.86381600  |          |          |              |
|          | H | -0.37600900 | -2.36028400 | -1.41587900 |          |          |              |
|          | H | 1.43196900  | -2.09897700 | -1.80110600 |          |          |              |
|          | N | 2.18755300  | 0.77079600  | -0.00345700 |          |          |              |
|          | O | 1.30902200  | 1.35977300  | -0.56763300 |          |          |              |
|          | O | 3.25783800  | 1.11972400  | 0.38077400  |          |          |              |
|          | O | 1.93977000  | -0.67247300 | 0.29424000  |          |          |              |
|          | O | -1.61032300 | -1.39393700 | 0.64304600  |          |          |              |
|          | O | -2.69952100 | -0.24352300 | -0.16853900 |          |          |              |
|          | N | -2.25033600 | 0.89533800  | 0.08041800  |          |          |              |
|          | O | -2.80941400 | 1.89134600  | -0.30641100 |          |          |              |
| IM2C-TS1 | C | -0.87535    | 0.58494     | -0.06944    | 0.081271 | 0.039121 | -471.3960668 |
|          | C | -1.54712    | -0.69431    | 0.38597     |          |          |              |
|          | H | -0.98057    | -1.84617    | 0.64738     |          |          |              |
|          | C | -1.41856    | 1.79475     | -0.00018    |          |          |              |
|          | H | -2.54918    | -0.47361    | 0.78876     |          |          |              |
|          | H | -2.4227     | 1.92559     | 0.383       |          |          |              |
|          | H | -0.88225    | 2.66828     | -0.34772    |          |          |              |

|          |   |          |          |          |          |          |              |
|----------|---|----------|----------|----------|----------|----------|--------------|
|          | N | 1.45806  | -0.02675 | 0.08345  |          |          |              |
|          | O | 1.24842  | -0.15944 | 1.26103  |          |          |              |
|          | O | 2.44108  | -0.21217 | -0.56233 |          |          |              |
|          | O | 0.34107  | 0.45716  | -0.73954 |          |          |              |
|          | O | -1.57005 | -1.70103 | -0.52844 |          |          |              |
| IM2C-TS2 | C | -0.72243 | 0.18722  | -0.49881 | 0.082330 | 0.036811 | -471.3972296 |
|          | C | -2.31101 | -0.7573  | -0.14038 |          |          |              |
|          | H | -2.88146 | -0.40405 | -1.02084 |          |          |              |
|          | C | -0.90305 | 1.52148  | -0.52044 |          |          |              |
|          | H | -1.94828 | -1.79501 | -0.237   |          |          |              |
|          | H | -1.87181 | 1.93765  | -0.28226 |          |          |              |
|          | H | -0.0832  | 2.18187  | -0.78049 |          |          |              |
|          | N | 1.86621  | -0.08681 | 0.12403  |          |          |              |
|          | O | 1.8326   | 0.9801   | 0.65809  |          |          |              |
|          | O | 2.68522  | -0.93667 | -0.0276  |          |          |              |
|          | O | 0.20875  | -0.64441 | -0.5865  |          |          |              |
|          | O | -2.55903 | -0.27667 | 1.00728  |          |          |              |
| IM2C-TS3 | C | -0.87535 | 0.58494  | -0.06944 | 0.078008 | 0.034896 | -471.3956386 |
|          | C | -1.54712 | -0.69431 | 0.38597  |          |          |              |
|          | H | -0.99024 | -1.12142 | 1.24793  |          |          |              |
|          | C | -1.41856 | 1.79475  | -0.00018 |          |          |              |
|          | H | -3.02199 | -0.7544  | 1.02881  |          |          |              |
|          | H | -2.4227  | 1.92559  | 0.383    |          |          |              |
|          | H | -0.88225 | 2.66828  | -0.34772 |          |          |              |
|          | N | 1.45806  | -0.02675 | 0.08345  |          |          |              |
|          | O | 1.24842  | -0.15944 | 1.26103  |          |          |              |
|          | O | 2.44108  | -0.21217 | -0.56233 |          |          |              |
|          | O | 0.34107  | 0.45716  | -0.73954 |          |          |              |
|          | O | -1.57005 | -1.70103 | -0.52844 |          |          |              |
| IM2C-TS4 | C | -0.87621 | 0.51406  | -0.23442 | 0.079639 | 0.038977 | -471.3899143 |
|          | C | -1.54712 | -0.69431 | 0.38597  |          |          |              |
|          | H | -0.62012 | -0.61119 | 1.35001  |          |          |              |
|          | C | -1.43666 | 1.71087  | -0.36499 |          |          |              |
|          | H | -2.56514 | -0.43351 | 0.71866  |          |          |              |
|          | H | -2.45495 | 1.87987  | -0.03826 |          |          |              |
|          | H | -0.89972 | 2.5319   | -0.82226 |          |          |              |
|          | N | 1.24517  | -0.00307 | 0.29547  |          |          |              |
|          | O | 0.68349  | -0.48998 | 1.43434  |          |          |              |
|          | O | 2.38561  | 0.13084  | -0.01951 |          |          |              |
|          | O | 0.36405  | 0.30891  | -0.83831 |          |          |              |
|          | O | -1.52654 | -1.79324 | -0.345   |          |          |              |
| IM2D-TS1 | C | -1.05389 | 0.4908   | -0.11174 | 0.083067 | 0.036095 | -471.4448463 |
|          | C | -1.54797 | -0.79003 | 0.10519  |          |          |              |

|   |          |          |          |  |  |  |
|---|----------|----------|----------|--|--|--|
| H | -1.23235 | -2.67801 | 0.06223  |  |  |  |
| C | -1.71152 | 1.67266  | 0.14222  |  |  |  |
| H | -2.52408 | -0.94835 | 0.54578  |  |  |  |
| H | -2.72454 | 1.67199  | 0.5218   |  |  |  |
| H | -1.22938 | 2.61729  | -0.0624  |  |  |  |
| N | 1.55792  | 0.22171  | 0.32287  |  |  |  |
| O | 1.32099  | 0.03374  | 1.48251  |  |  |  |
| O | 2.58935  | 0.22157  | -0.27811 |  |  |  |
| O | 0.20164  | 0.58343  | -0.72738 |  |  |  |
| O | -0.79125 | -1.8682  | -0.21153 |  |  |  |
